# Supplementary material
Source: publisher figshare collection journal article supplement (https://frontiersin.figshare.com/ndownloader/files/21106515)

# Supplementary Figures

Language processing as a precursor to language change: evidence  
from Icelandic

January 2, 2020

Figure S1: Grand average ERPs for Active verbs. Shaded regions show 95% confidence intervals by participants

## Grand average ERPs – ACT verbs

95% CIs by participant

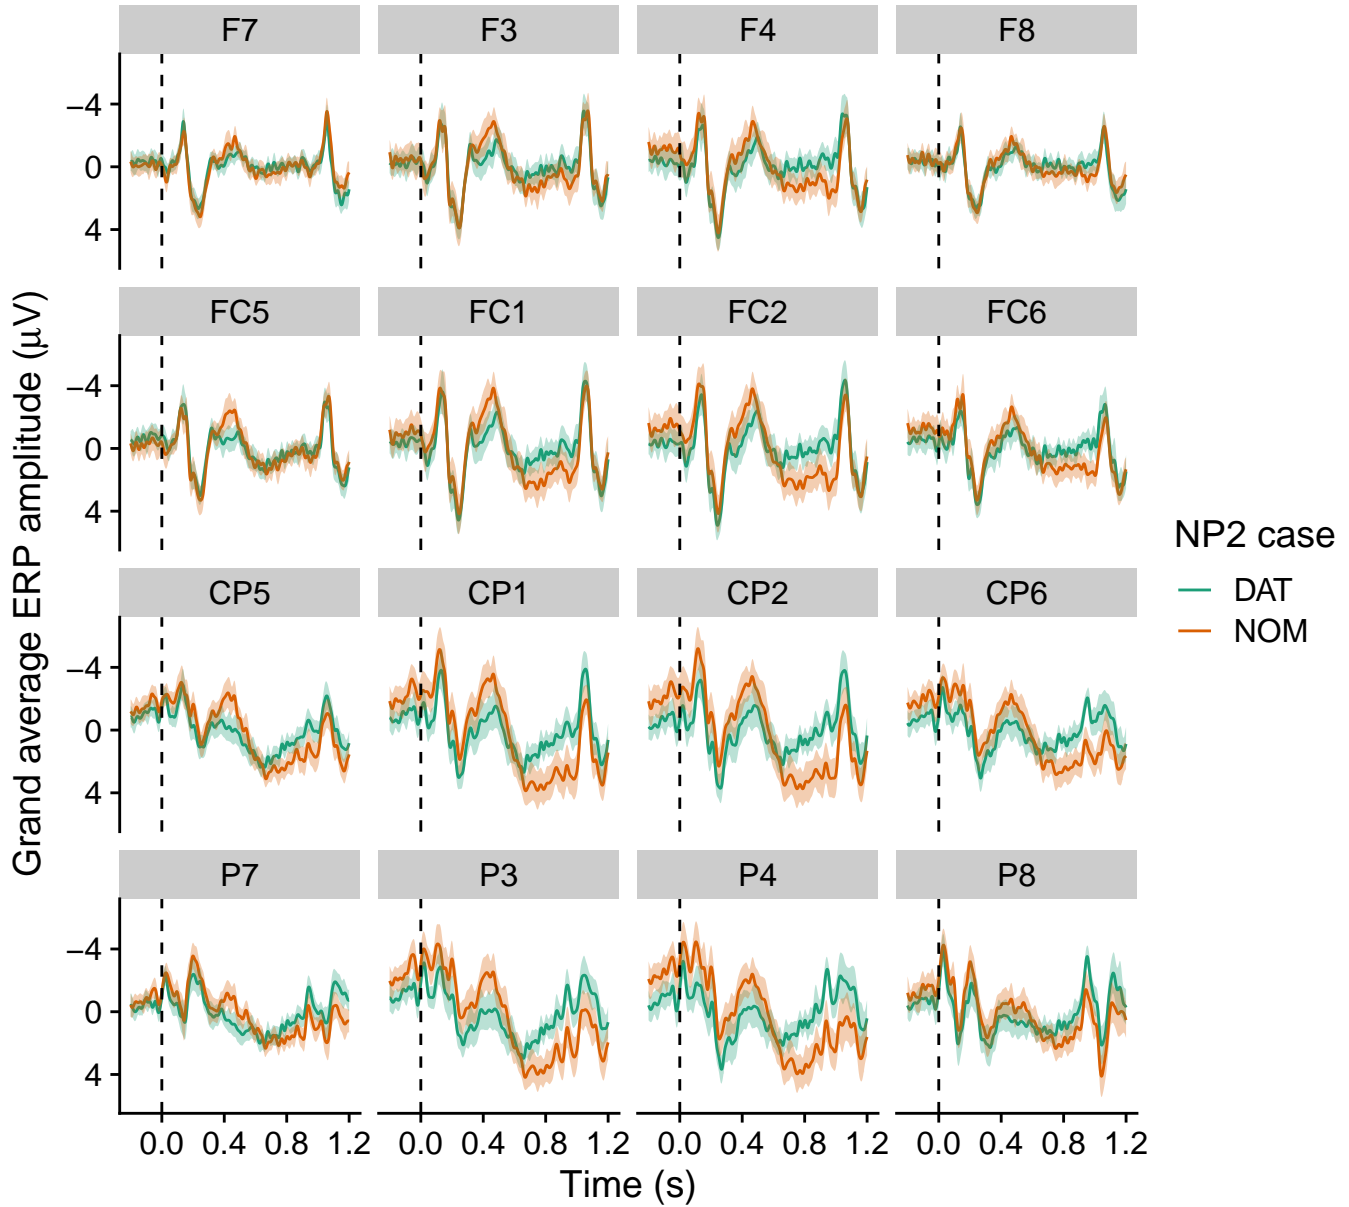

Figure S2: Grand average ERPs for Active verbs. Shaded regions show 95% confidence intervals by items

## Grand average ERPs – ACT verbs

95% CIs by item

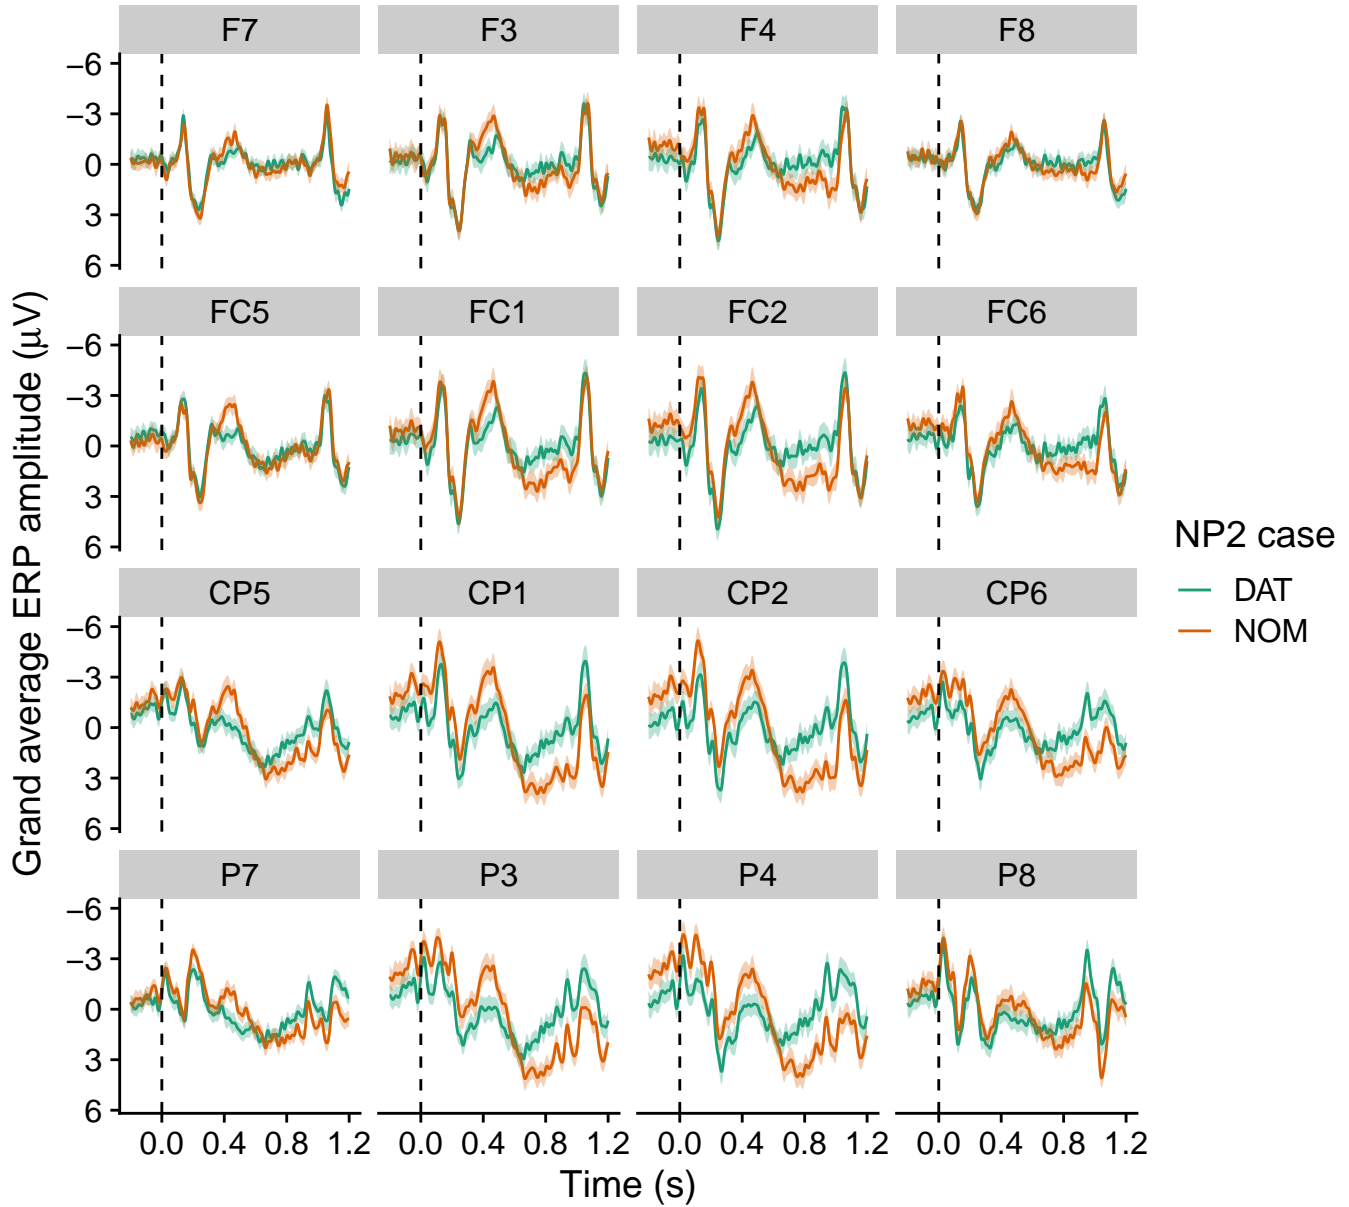

Figure S3: Grand average ERPs for Alternating verbs. Shaded regions show 95% confidence intervals by participants

## Grand average ERPs – ALT verbs

95% CIs by participant

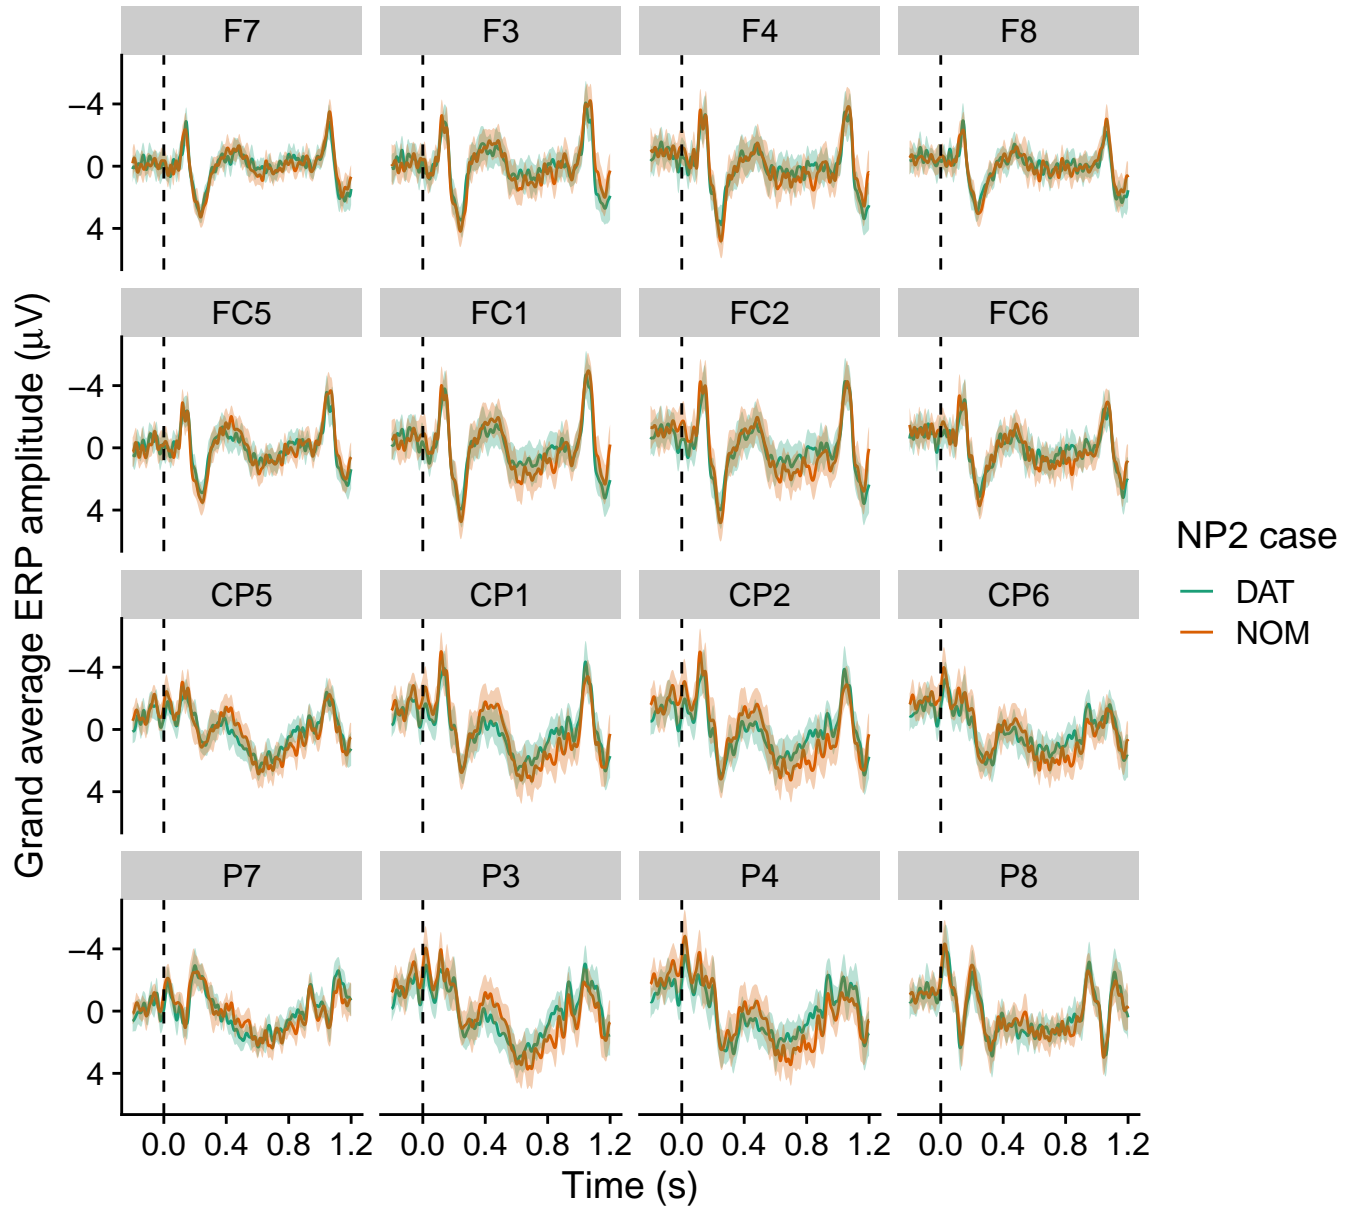

Figure S4: Grand average ERPs for Alternating verbs. Shaded regions show 95% confidence intervals by items

## Grand average ERPs – ALT verbs

95% CIs by item

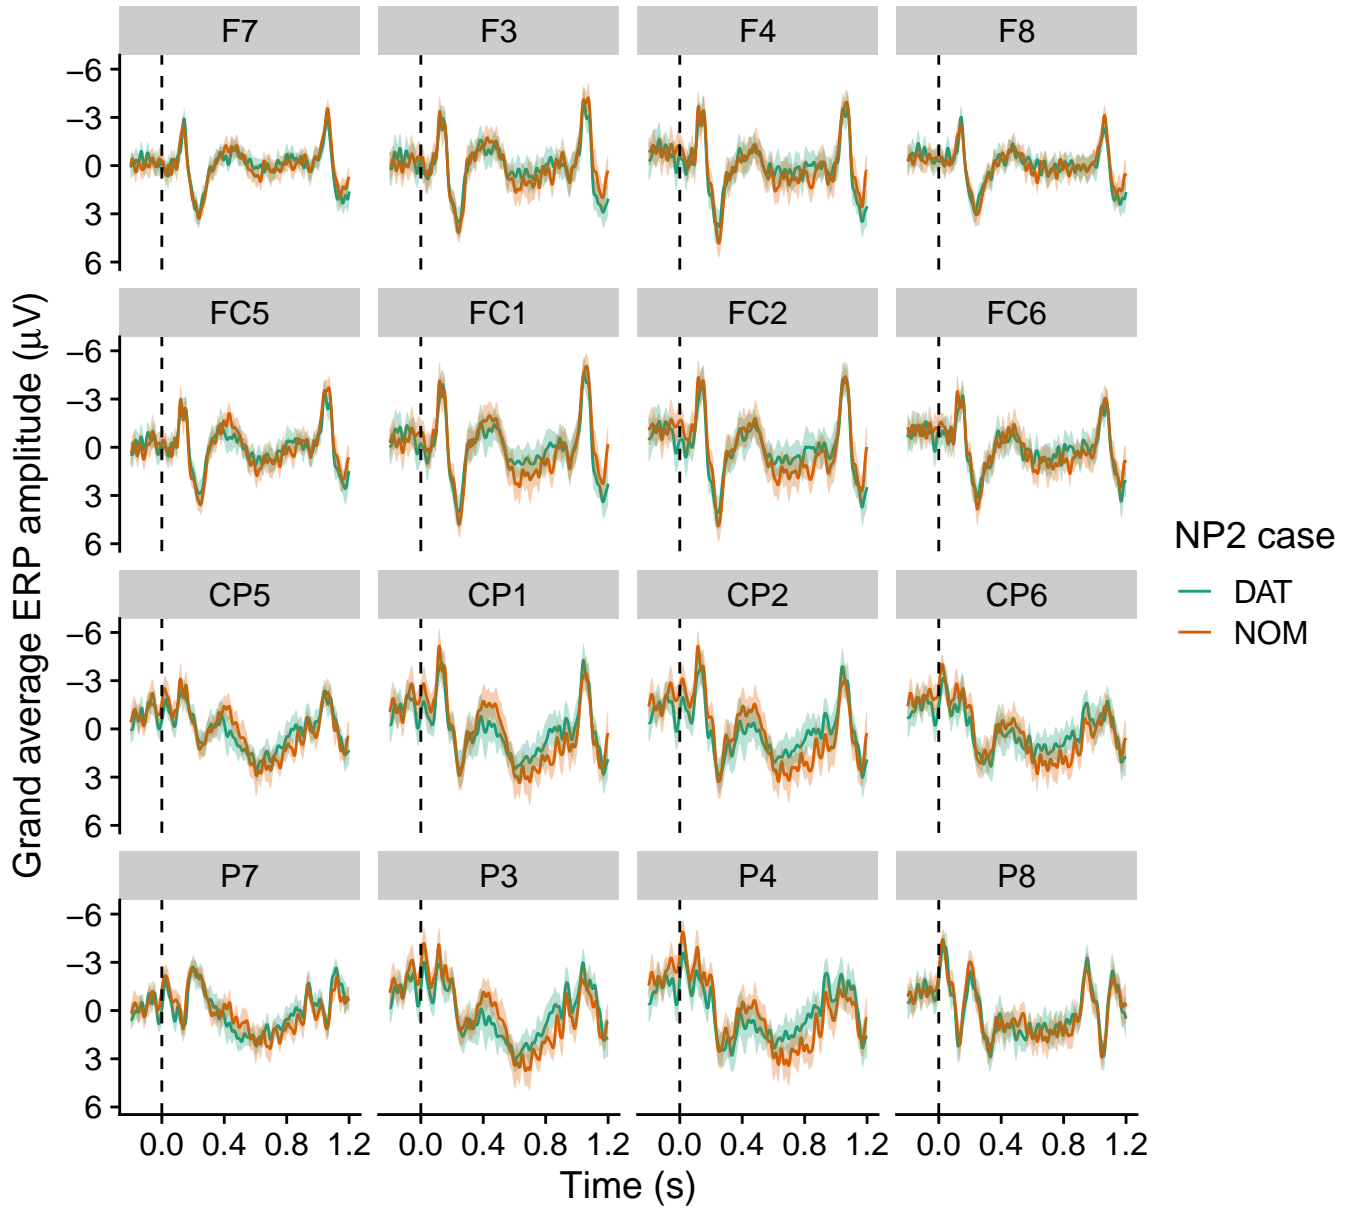

Figure S5: Grand average ERPs for Experiencer verbs. Shaded regions show 95% confidence intervals by participants

## Grand average ERPs – EXP verbs

95% CIs by participant

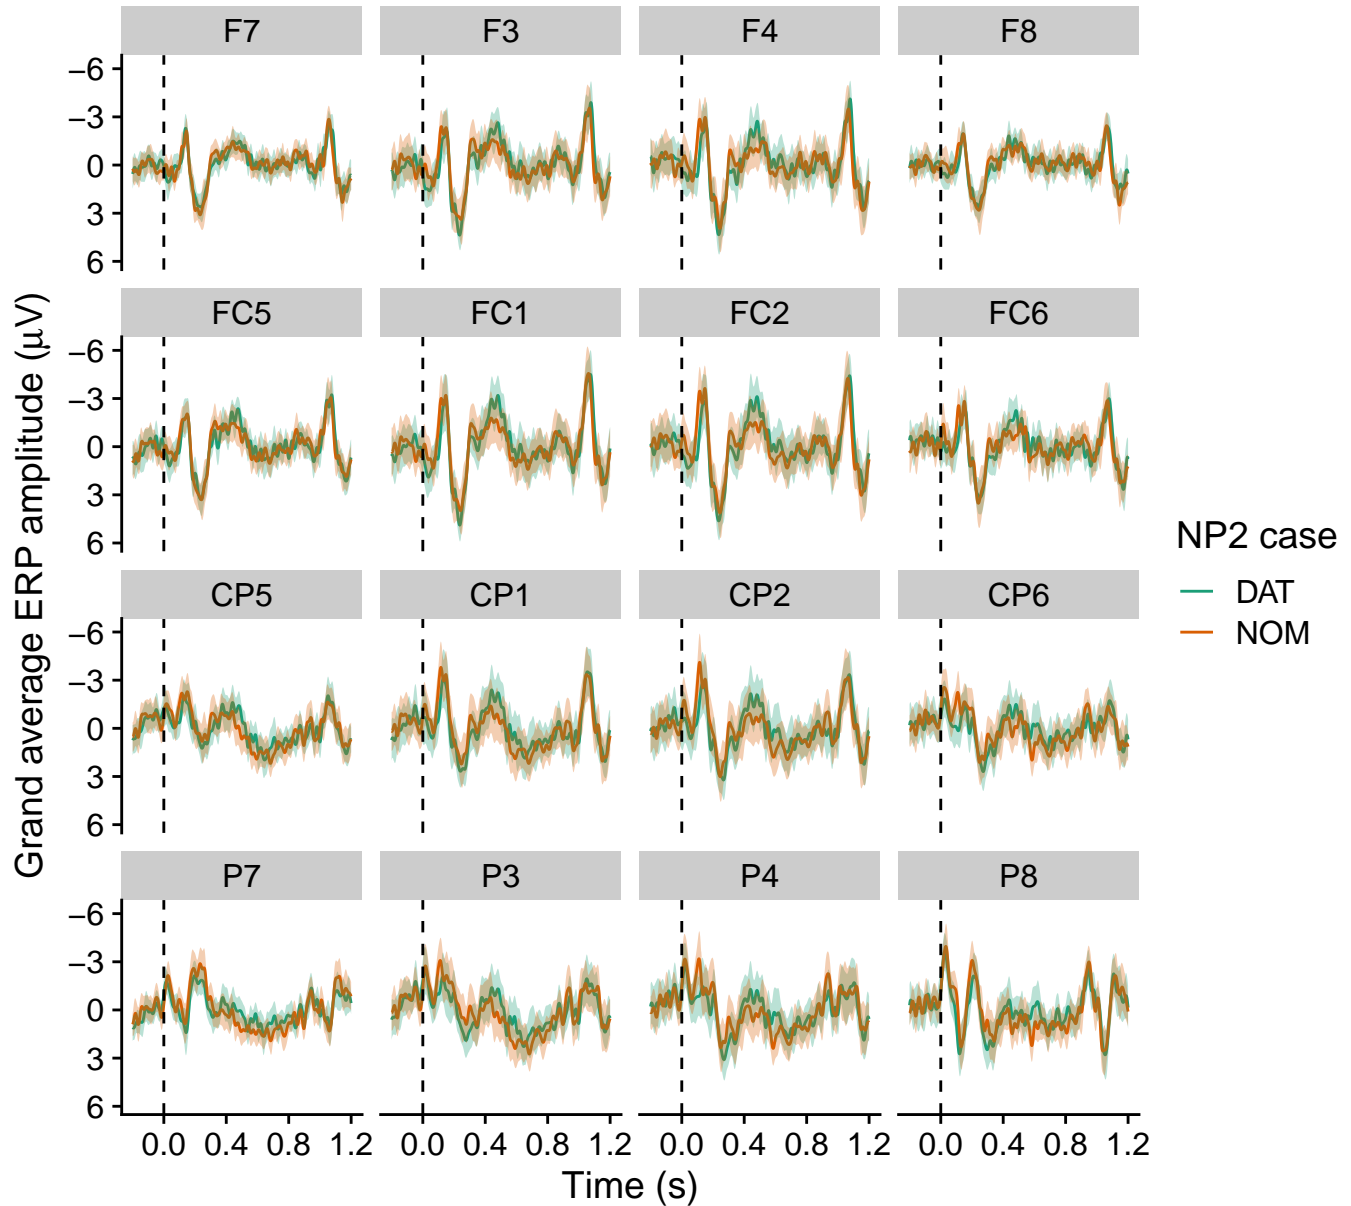

Figure S6: Grand average ERPs for Experiencer verbs. Shaded regions show 95% confidence intervals by items

## Grand average ERPs – EXP verbs

95% CIs by item

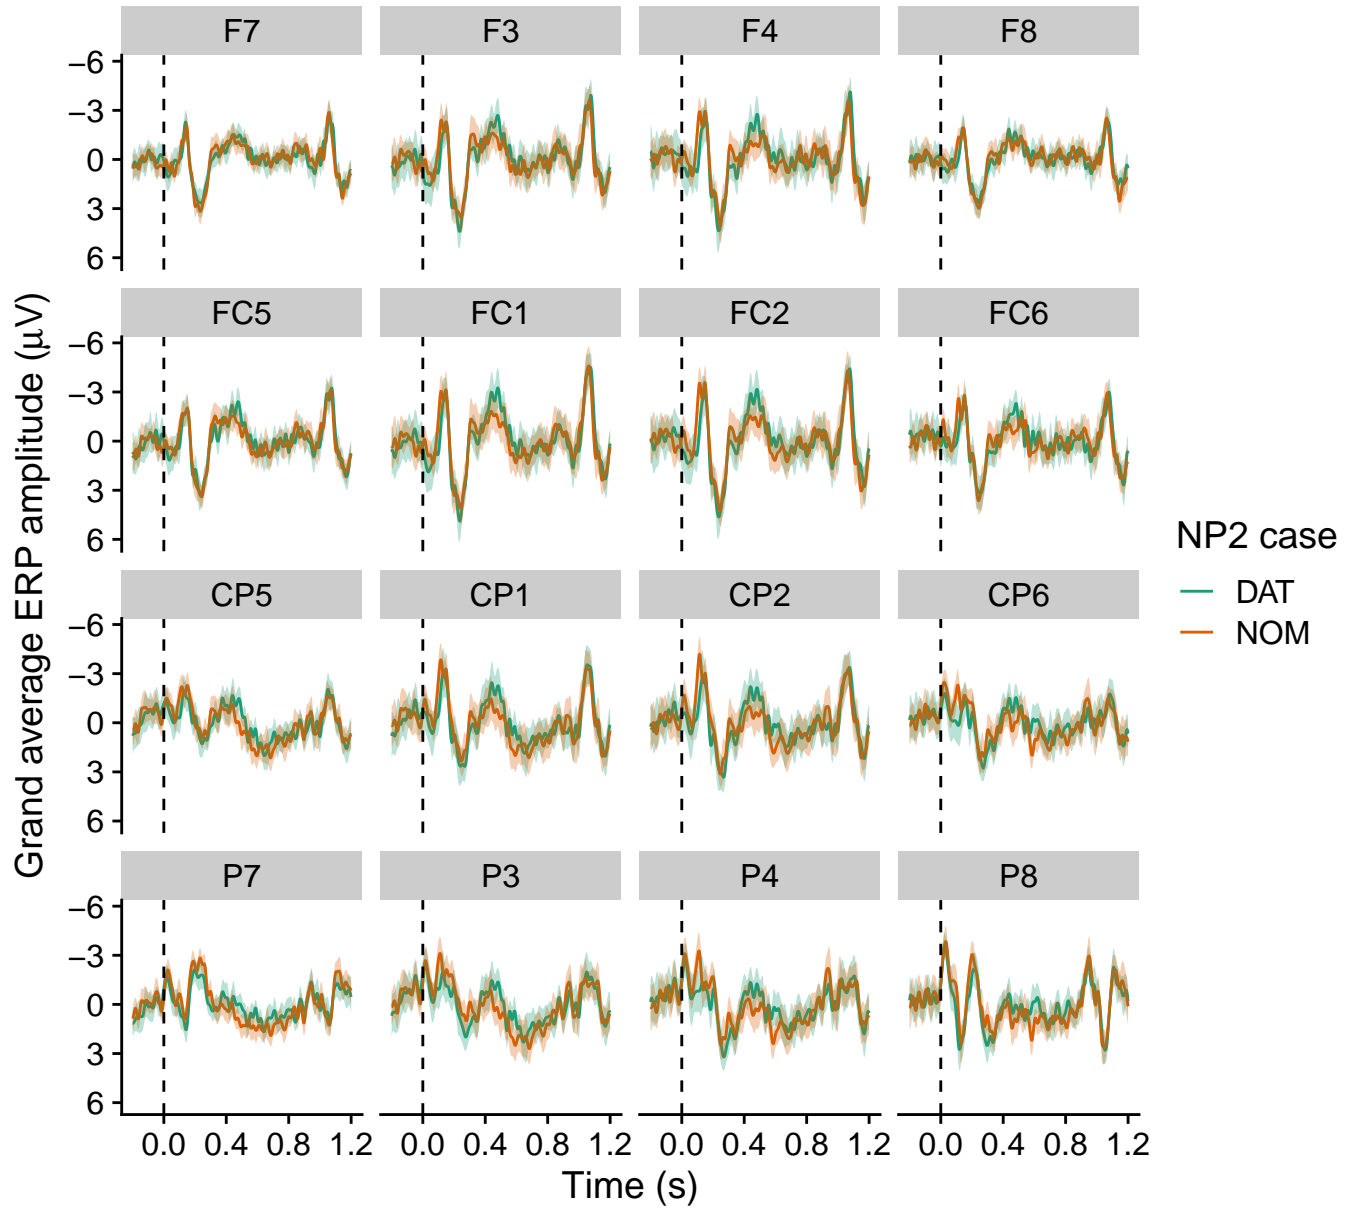

Figure S7: Resolution of verb type x case x trial x sagittality x prestimulus amplitude interaction for the N400 time window. Prestimulus amplitude =  $-5 \mu V$ .

N400 amplitude as modelled  $\sim$  verb type, case, trial and sagittality – prestim =  $-5$   
 Model includes by-participant random slopes for case\*verb and by-item random slopes for case

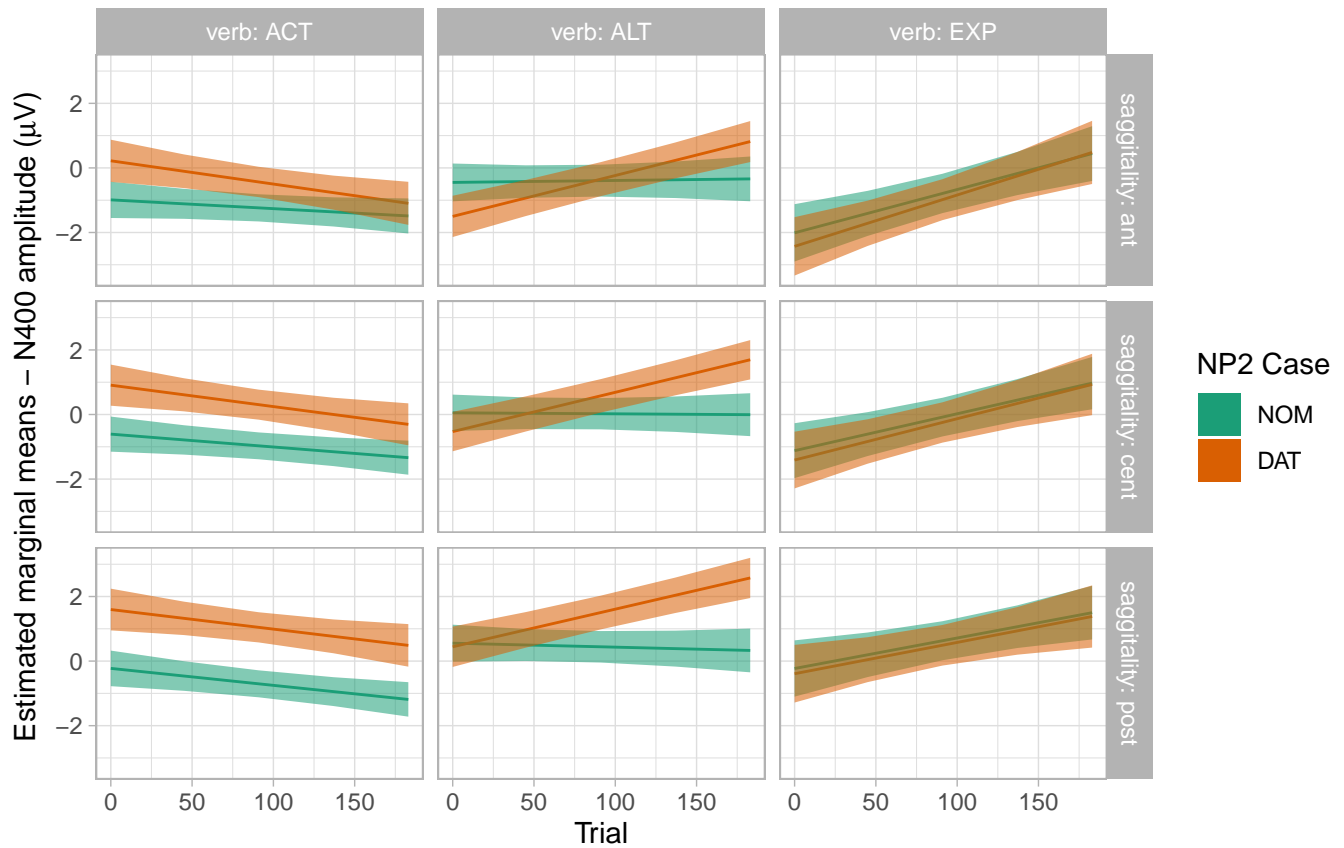



Figure S8: Resolution of verb type x case x trial x sagittality x prestimulus amplitude interaction for the N400 time window. Prestimulus amplitude = 0  $\mu V$ .

N400 amplitude as modelled  $\sim$  verb type, case, trial and sagittality – prestim = 0  
 Model includes by-participant random slopes for case\*verb and by-item random slopes for case

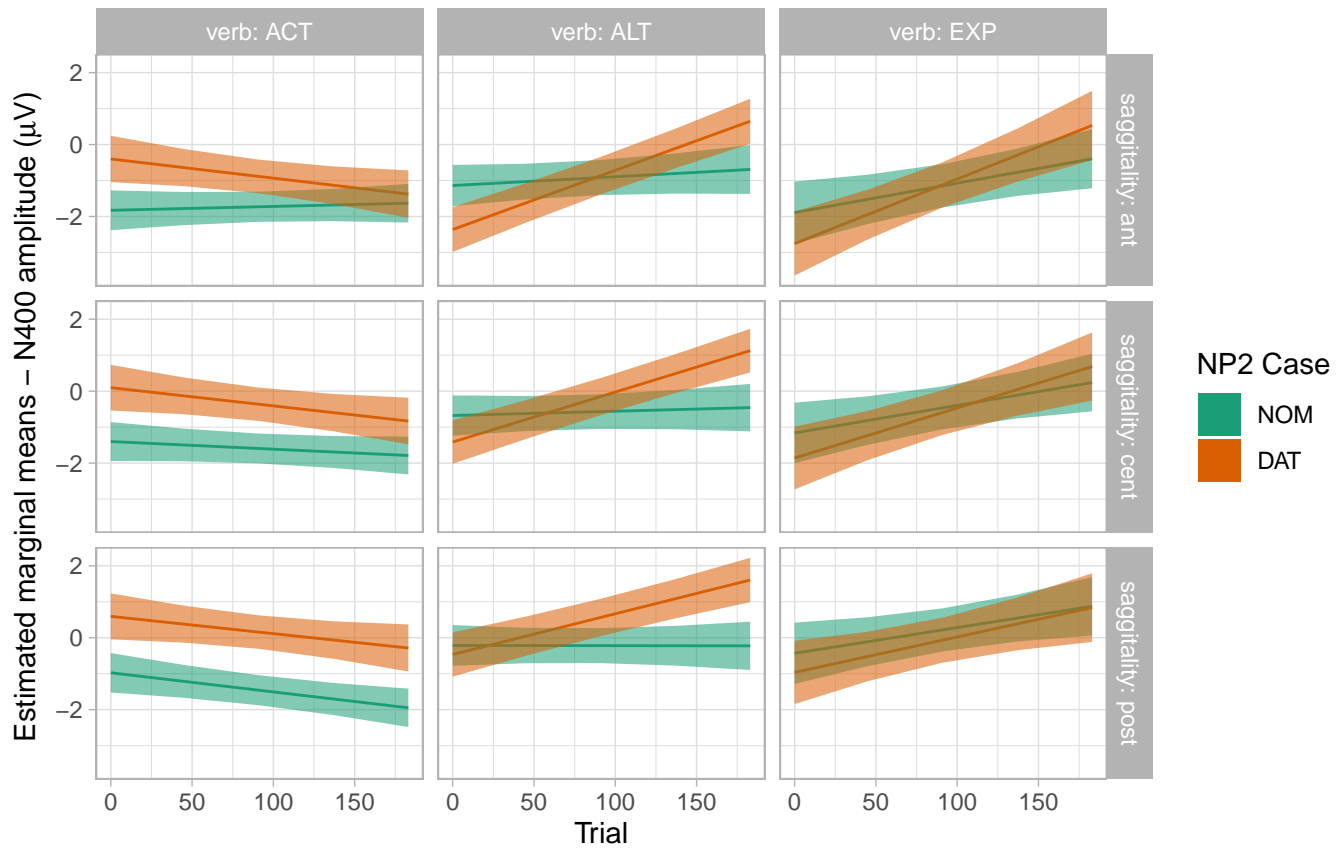

Figure S9: Resolution of verb type x case x trial x sagittality x prestimulus amplitude interaction for the N400 time window. Prestimulus amplitude = 5  $\mu V$ .

N400 amplitude as modelled ~ verb type, case, trial and sagittality – prestim = 5  
Model includes by-participant random slopes for case\*verb and by-item random slopes for case

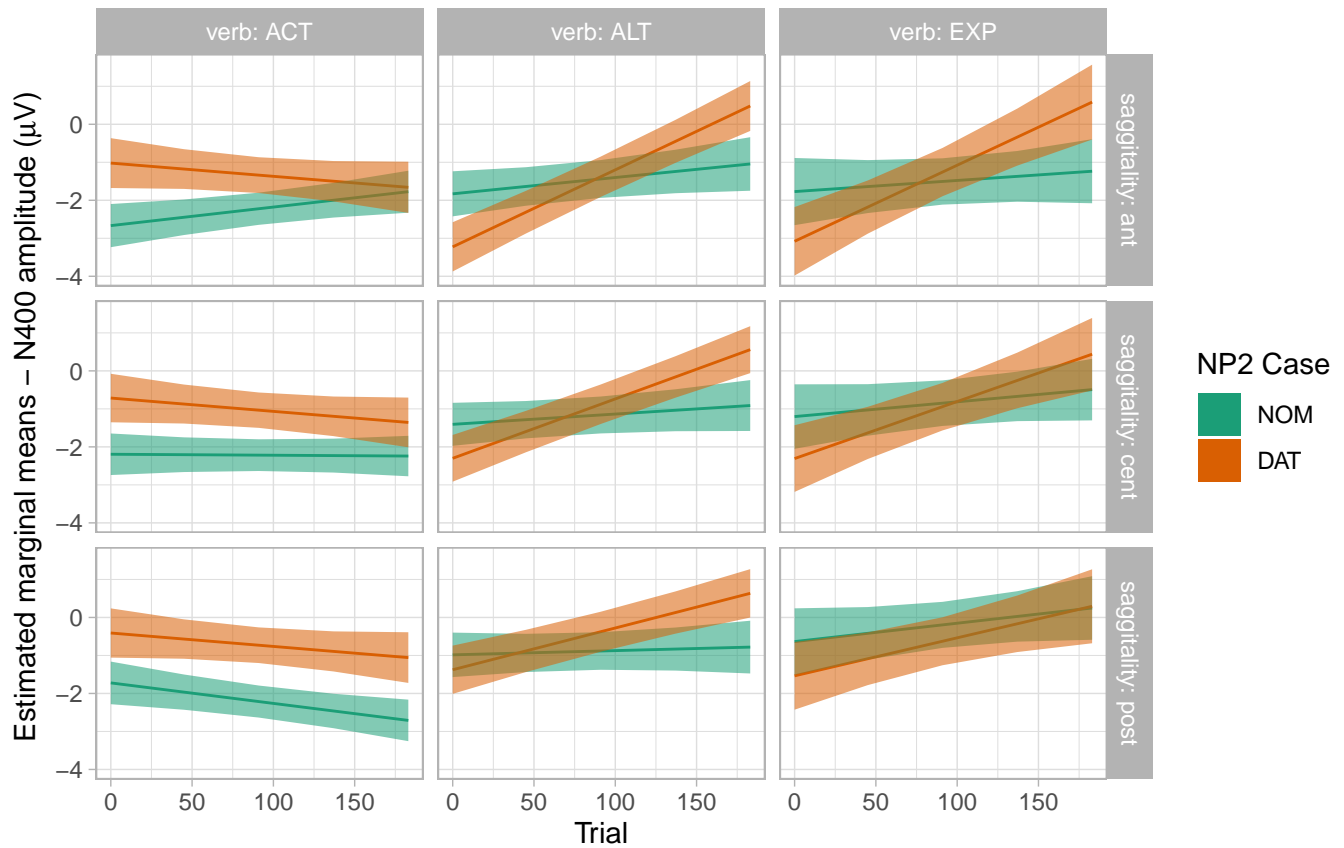

Figure S10: Resolution of verb type x case x trial x prestimulus amplitude interaction for the late positivity time window. Prestimulus amplitude =  $-5 \mu V$ .

LPS amplitude as modelled  $\sim$  verb type, case, trial and saggitality – prestim =  $-5$   
 Model includes by-participant random slopes for case\*verb and by-item random slopes for case

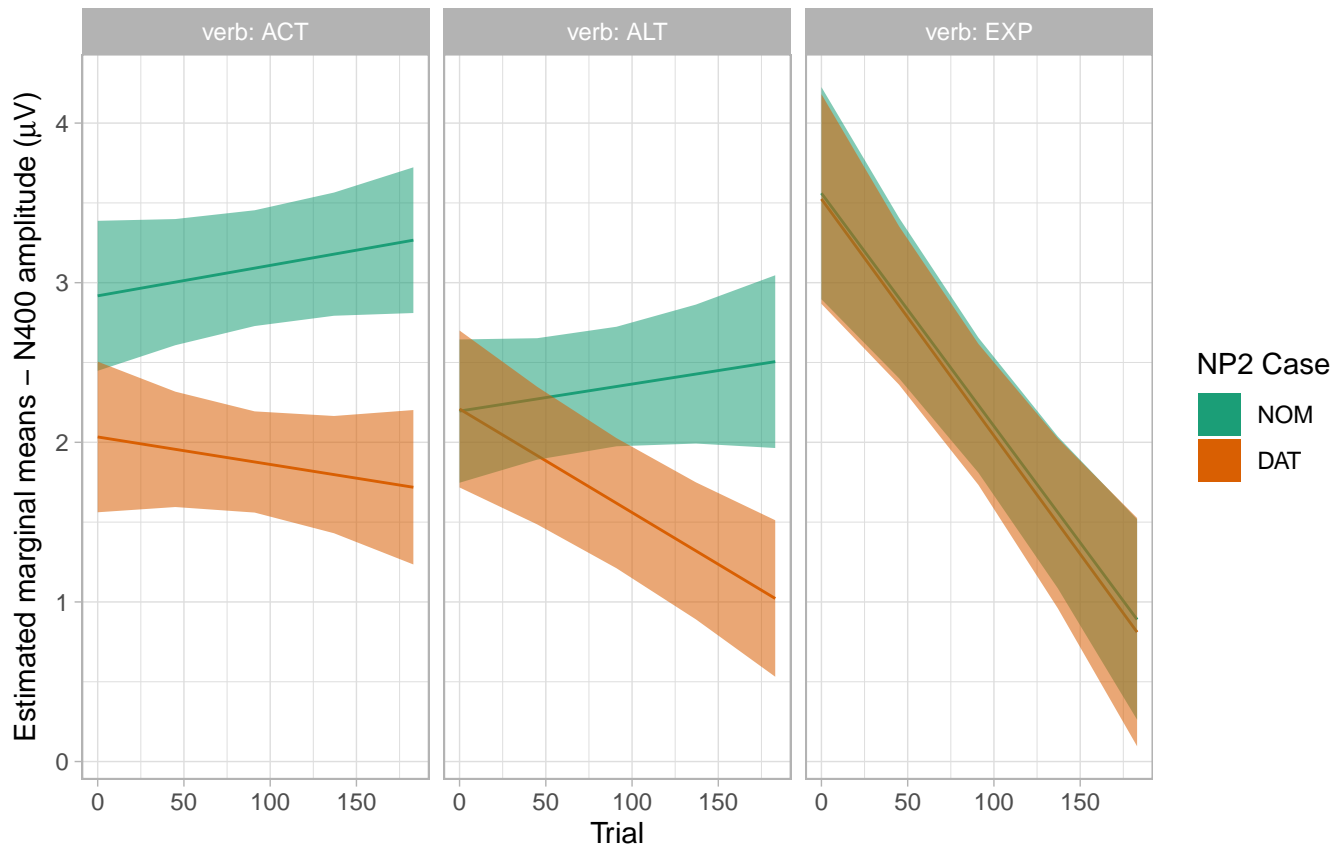

Figure S11: Resolution of verb type x case x trial x prestimulus amplitude interaction for the late positivity time window. Prestimulus amplitude = 0  $\mu\text{V}$ .

LPS amplitude as modelled ~ verb type, case, trial and saggitality – prestim = 0  
 Model includes by-participant random slopes for case\*verb and by-item random slopes for case

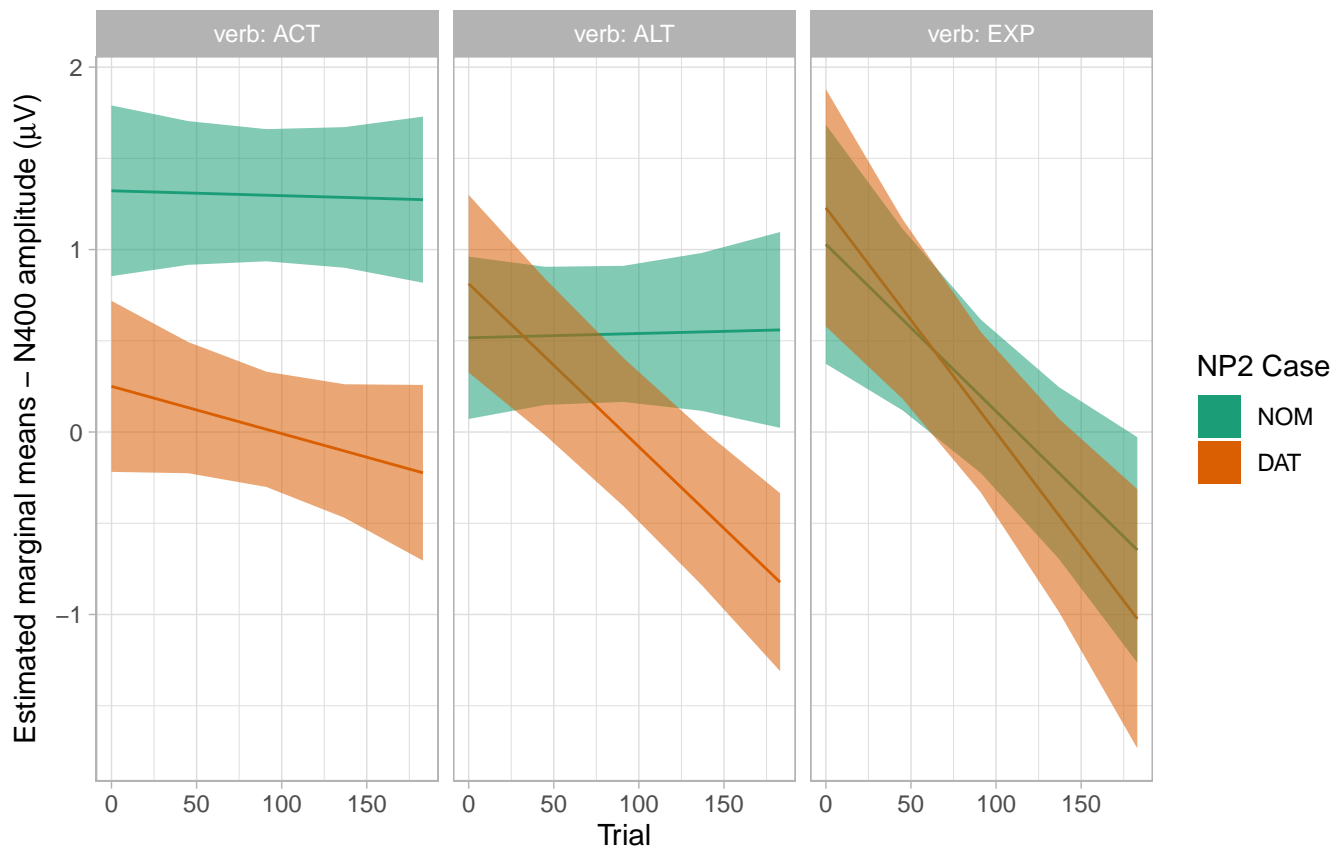

Figure S12: Resolution of verb type x case x trial x prestimulus amplitude interaction for the late positivity time window. Prestimulus amplitude = 5  $\mu$ V.

LPS amplitude as modelled ~ verb type, case, trial and saggitality – prestim = 5  
 Model includes by-participant random slopes for case\*verb and by-item random slopes for case

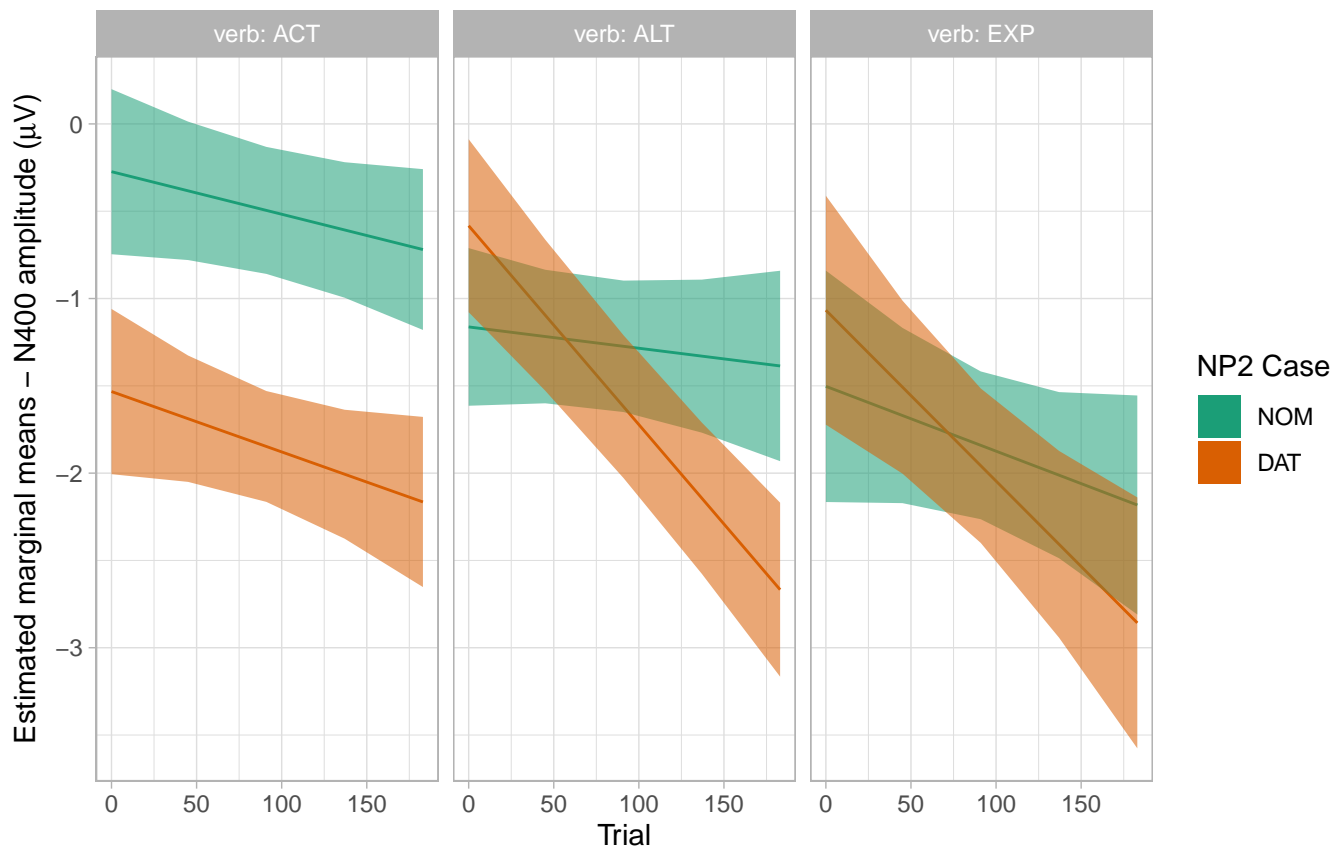

Figure S13: Resolution of case x acceptability x trial x prestimulus amplitude interaction for experienter verbs in the late positivity time window. Prestimulus amplitude =  $-5 \mu V$ .

**LPS amplitude as modelled for exp. verbs ~ case, trial and accept. – prestim =  $-5$**   
 Model includes by-participant and by-item random slopes for case

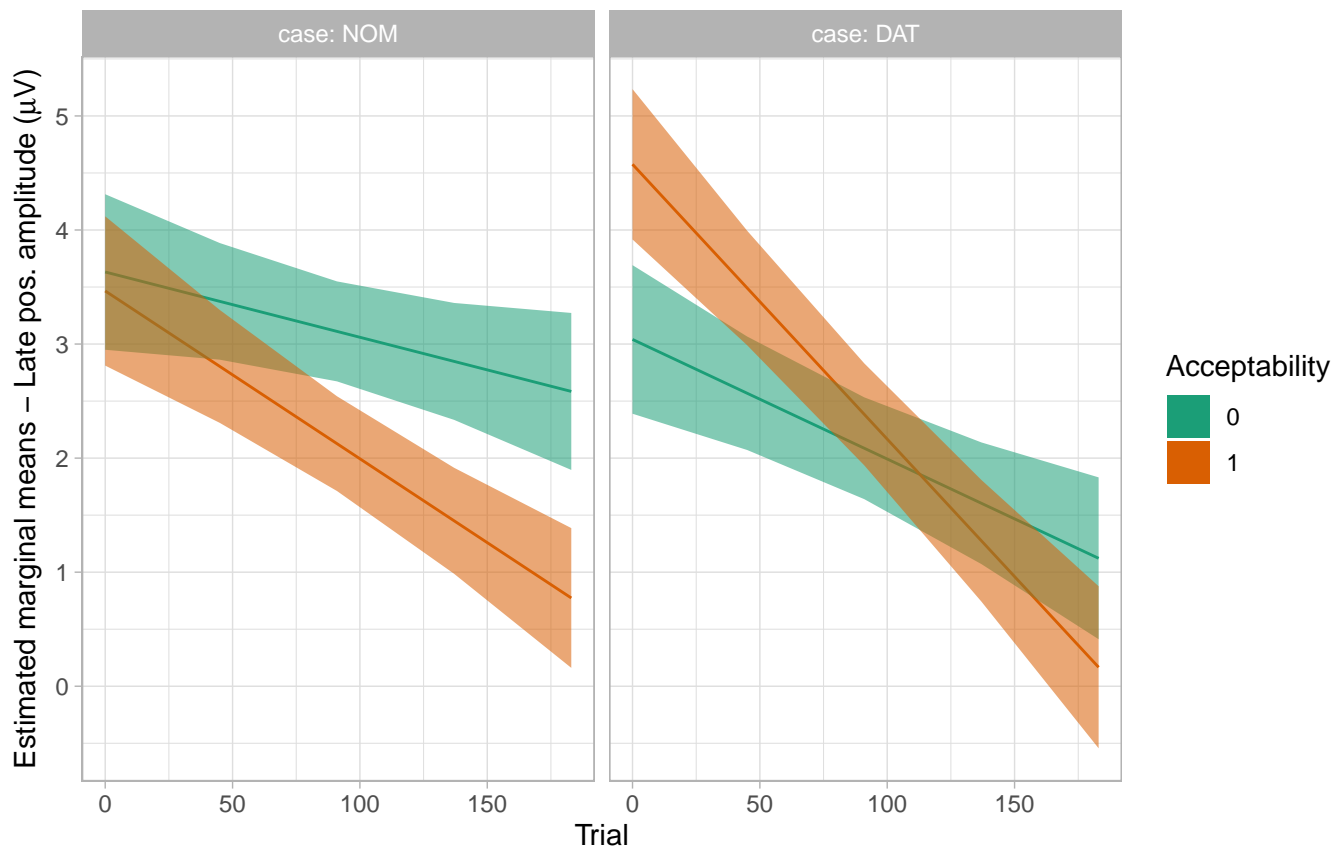

Figure S14: Resolution of case x acceptability x trial x prestimulus amplitude interaction for experienter verbs in the late positivity time window. Prestimulus amplitude = 0  $\mu V$ .

LPS amplitude as modelled for exp. verbs ~ case, trial and accept. – prestim = 0  
Model includes by-participant and by-item random slopes for case

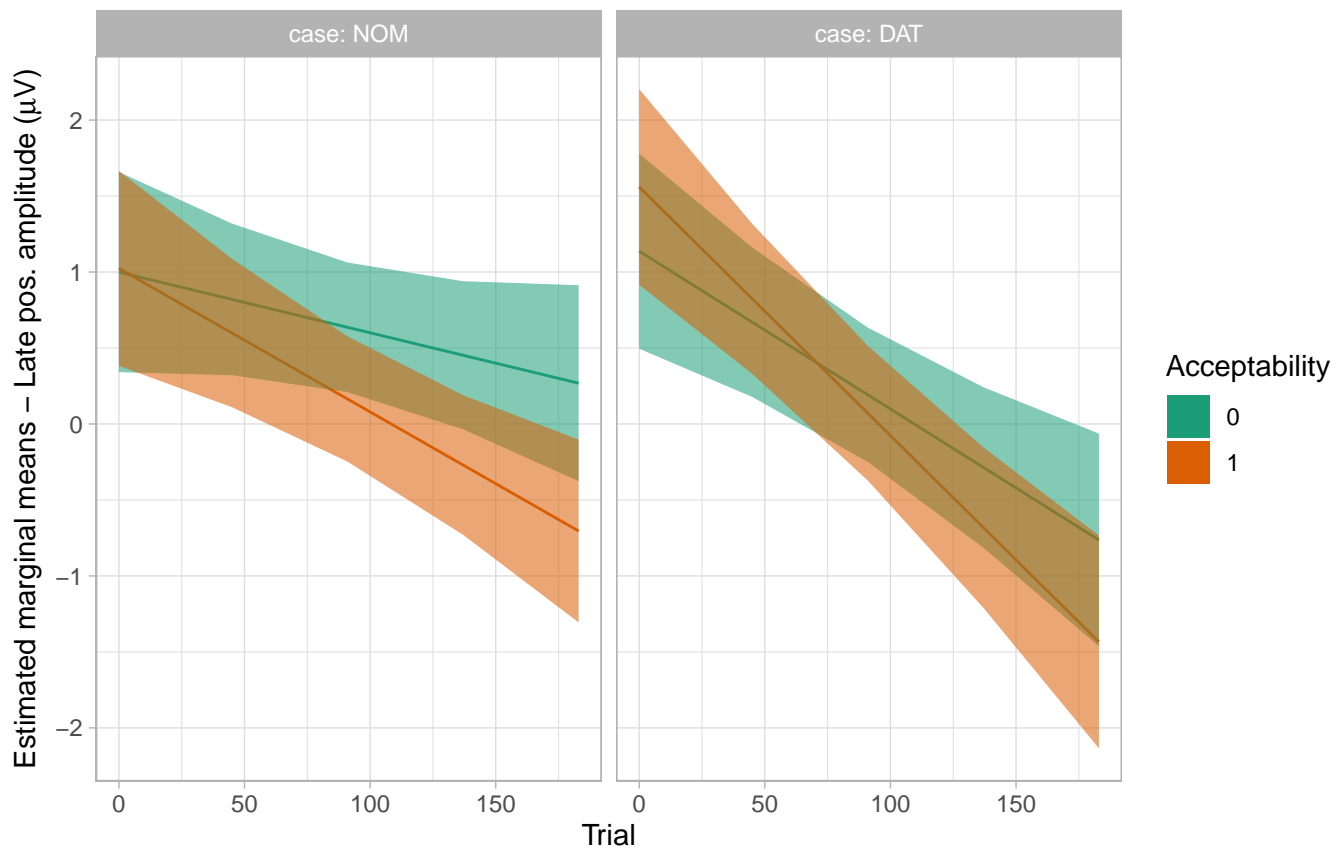

Figure S15: Resolution of case x acceptability x trial x prestimulus amplitude interaction for experienter verbs in the late positivity time window. Prestimulus amplitude = 5  $\mu V$ .

LPS amplitude as modelled for exp. verbs ~ case, trial and accept. – prestim = 5  
Model includes by-participant and by-item random slopes for case

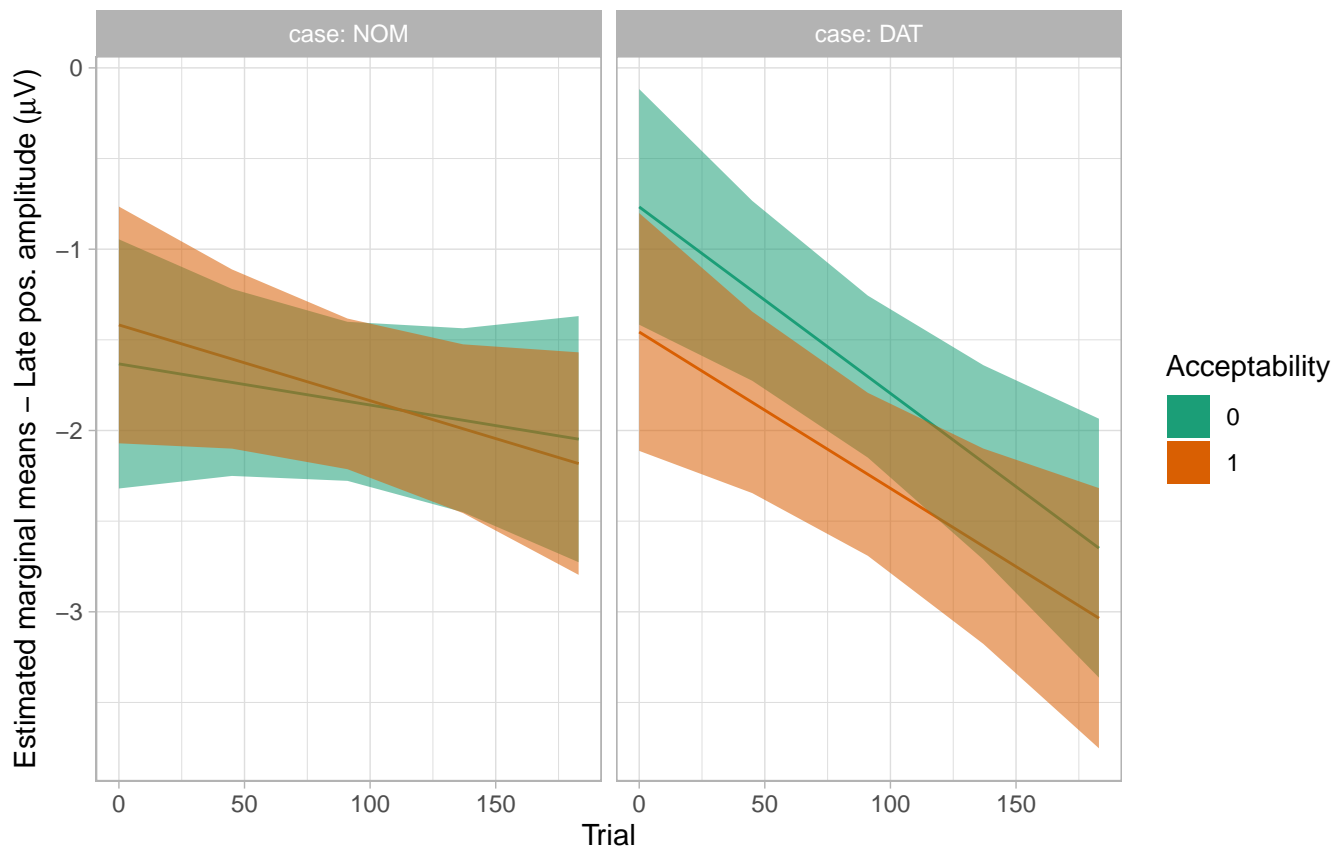



Figure S16: Trial-by-trial acceptabilities as predicted by N400 amplitude and verb type.

By-trial acceptability by N400 amplitude and verb class

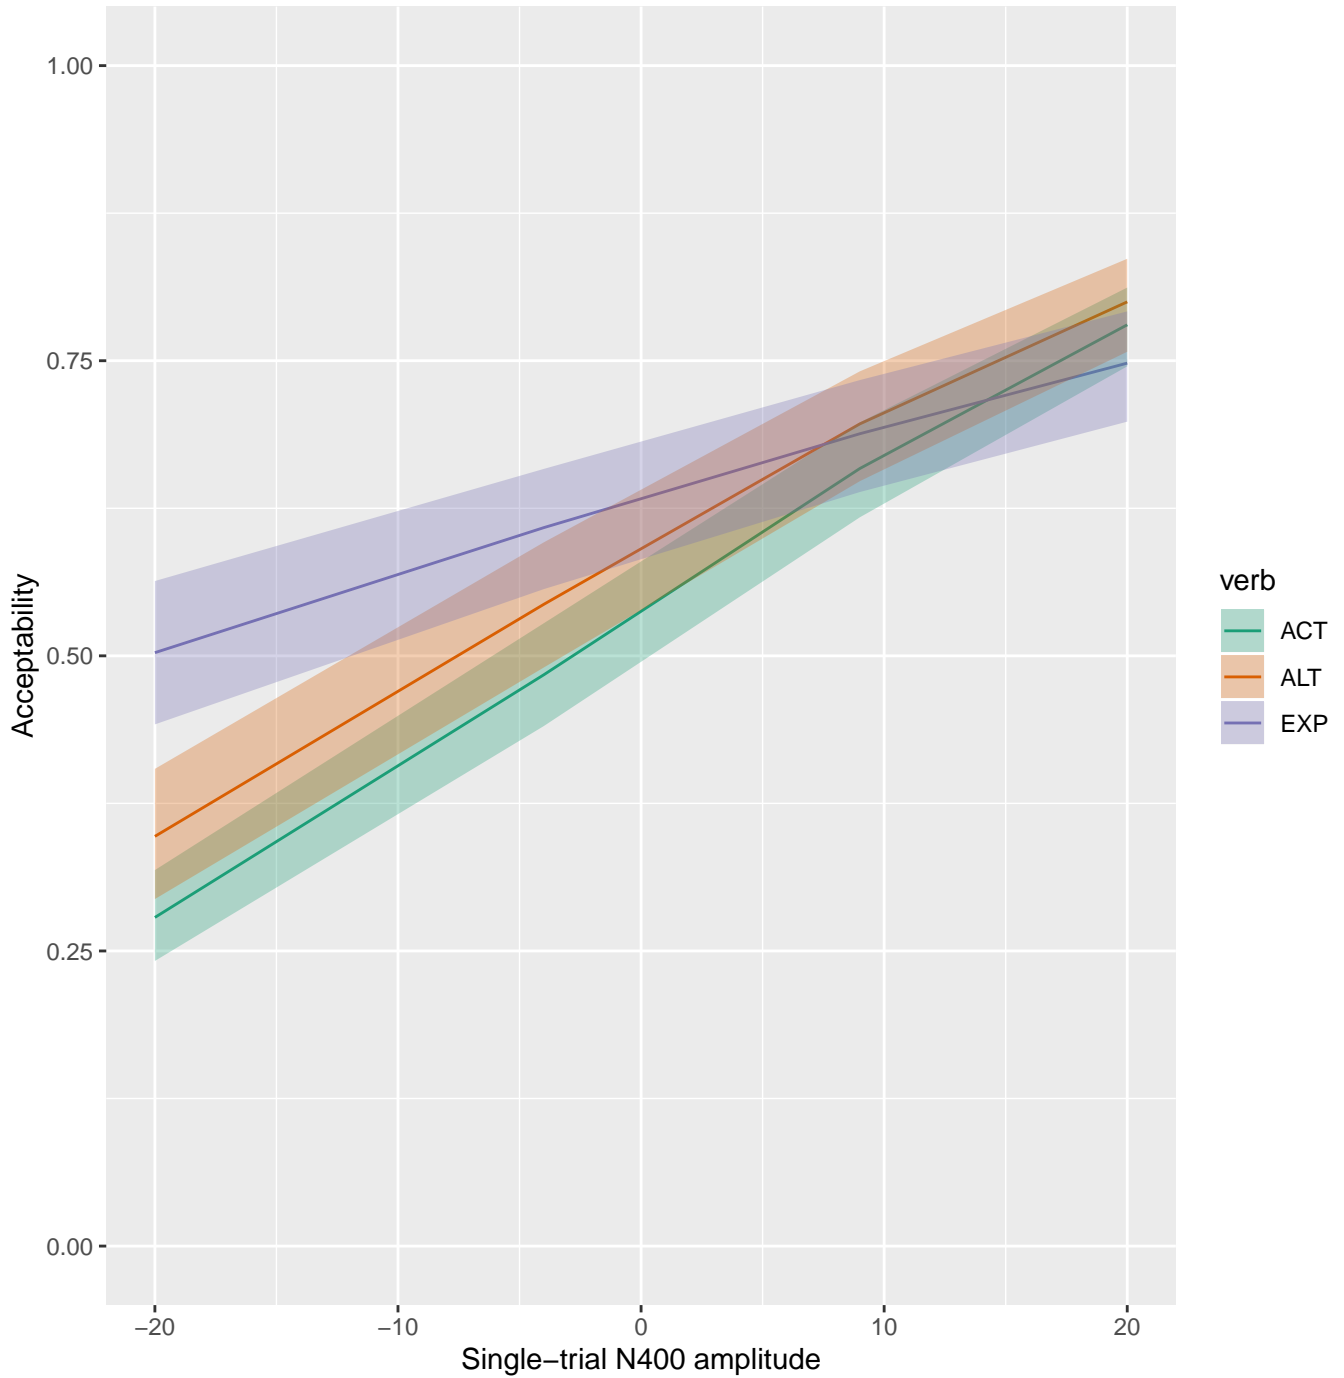

Figure S17: Trial-by-trial acceptabilities as predicted by late positivity amplitude and verb type.

By-trial acceptability by LPS amplitude and verb class

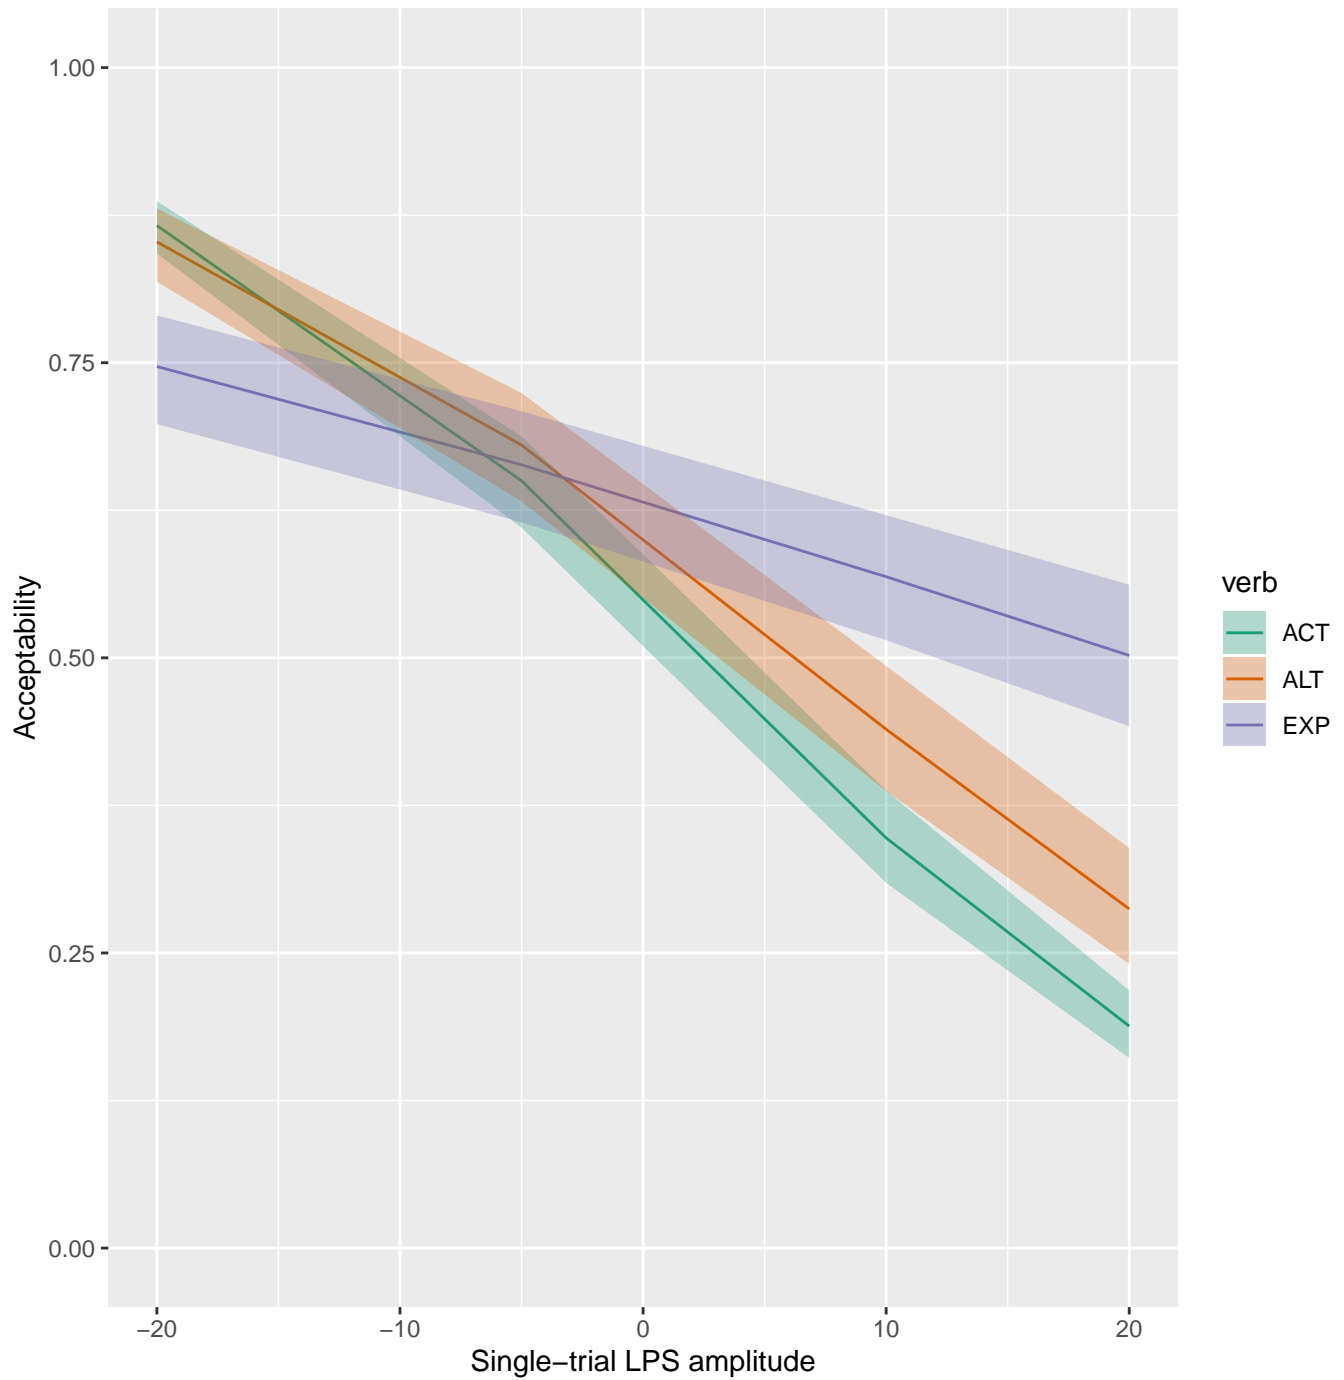

Supplement: Supplementary file [file 21106515]
